# Supplementary material for: SMN complex member Gemin3 self-interacts and has a functional relationship with ALS-linked proteins TDP-43, FUS and Sod1
Source: PubMed Central journal article supplement (PMC6904755; doi:10.1038/s41598-019-53508-4), 2019-12-10
Supplement: 41598_2019_53508_MOESM1_ESM.pdf [file 41598_2019_53508_MOESM1_ESM.pdf]

# SMN complex member Gemin3 self-interacts and has a functional relationship with ALS-linked proteins TDP-43, FUS and Sod1

Rebecca Cacciottolo<sup>1,2,3</sup>, Joanna Ciantar<sup>2,3</sup>, Maia Lanfranco<sup>1,2,3</sup>, Rebecca M. Borg<sup>1,2,3</sup>, Neville Vassallo<sup>2,3</sup>,  
Rémy Bordonné<sup>1</sup> & Ruben J. Cauchi<sup>2,3,\*</sup>

<sup>1</sup>*Institut de Génétique Moléculaire de Montpellier, CNRS-UMR 5535, Université de Montpellier, Montpellier, France*

<sup>2</sup>*Department of Physiology and Biochemistry, Faculty of Medicine and Surgery, University of Malta, Msida, Malta*

<sup>3</sup>*Centre for Molecular Medicine and Biobanking, Biomedical Sciences Building, University of Malta, Msida, Malta*

\* Corresponding Author

E-mail: [ruben.cauchi@um.edu.mt](mailto:ruben.cauchi@um.edu.mt)

## SUPPLEMENTARY FIGURE S1

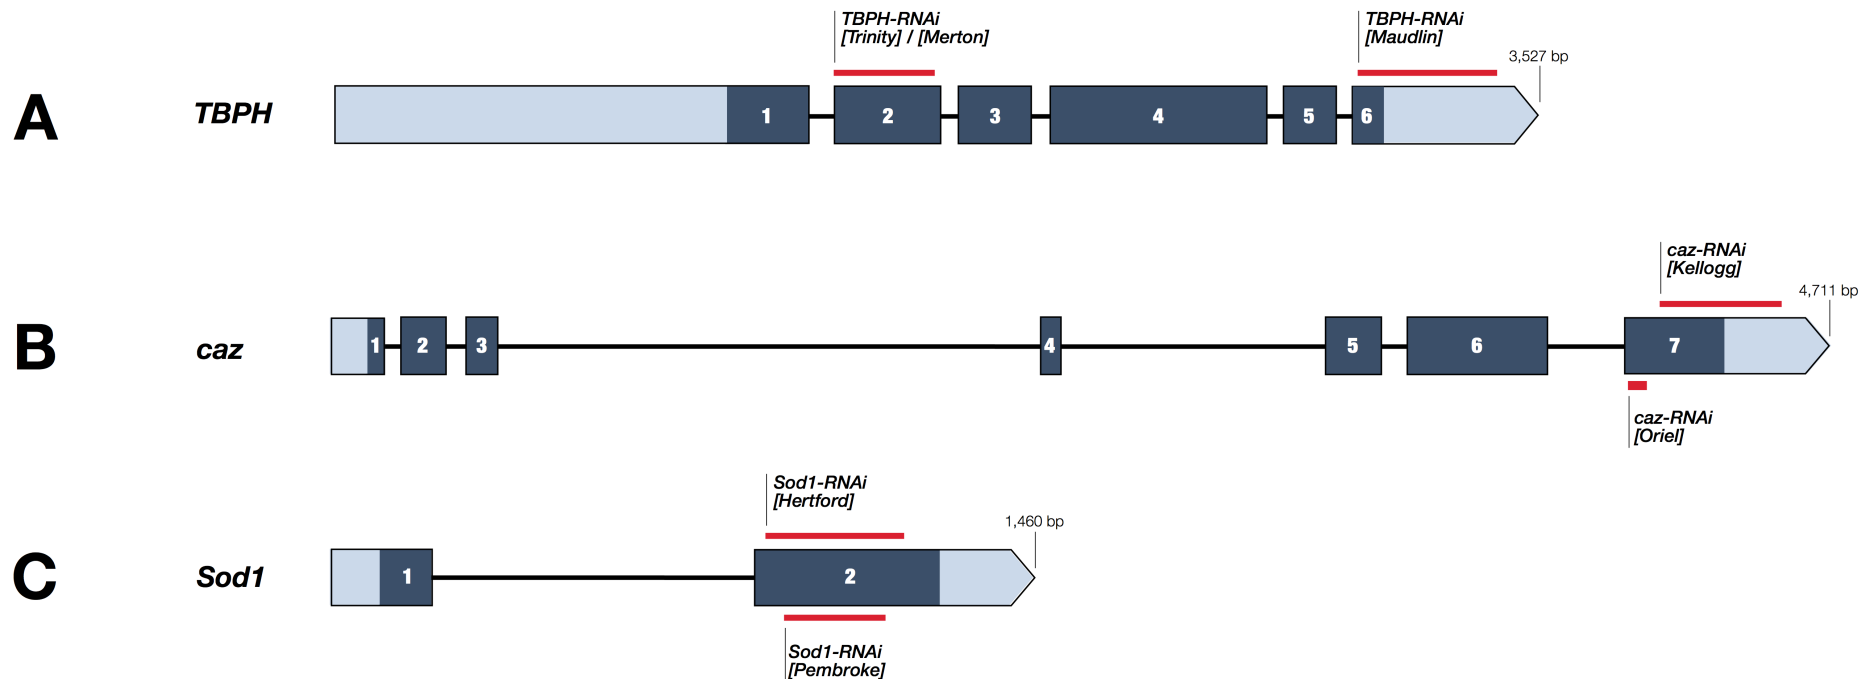

**Figure S1. RNAi constructs utilised in the study.** (A) The six-exon *TBPH* gene produces a 3.5 Kbp transcript (*TBPH-RC*, ID: FBtr0089625). *TBPH-RNAi [Trinity]* (chromosome 3 random insert) and *TBPH-RNAi [Merton]* (chromosome 2 random insert) are inducible RNAi constructs that have a 301 bp fragment derived from exon2 (annotated in red) as an inverted repeat (IR). A 392 bp fragment spanning exon6 and the 3' untranslated region or UTR (annotated in red) defines the IR of *TBPH-RNAi [Maudlin]* (chromosome 2 site-specific insert). (B) The seven-exon *caz* gene produces a 4.7 Kbp mRNA transcript (*caz-RB*, ID: FBtr0074217) that was targeted by two inducible RNAi transgenes. The *caz-RNAi [Kellogg]* transgene (chromosome 2 site-specific insert) consists of an IR composed of a 294 bp fragment spanning exon7 and the 3' UTR (annotated in red). The *caz-RNAi [Oriel]* transgene (chromosome 2 site-specific insert) consists of a short hairpin making use of a 21 bp targeting sequence derived from exon7 (annotated in red) that is embedded into a micro-RNA (miR-1) backbone. This strategy was shown to induce effective gene knockdown in both germline and somatic tissues<sup>1</sup>. (C) The two-exon *Sod1* gene produces a 1.46 Kbp mRNA transcript (*Sod1-RD*, ID: FBtr0333559). The *Sod1-RNAi [Hertford]* transgene (chromosome 3 random insert) consists of an IR composed of a 345 bp fragment derived from exon2 (annotated in red). The *Sod1-RNAi [Pembroke]* transgene (chromosome site-specific insert) consists of an IR composed of a 255 bp fragment also derived from exon2 (annotated in red). In (A-C) the transgenic constructs are attached to 10 copies of UAS sites to enhance RNAi efficiency<sup>2</sup>.

## SUPPLEMENTARY FIGURE S2

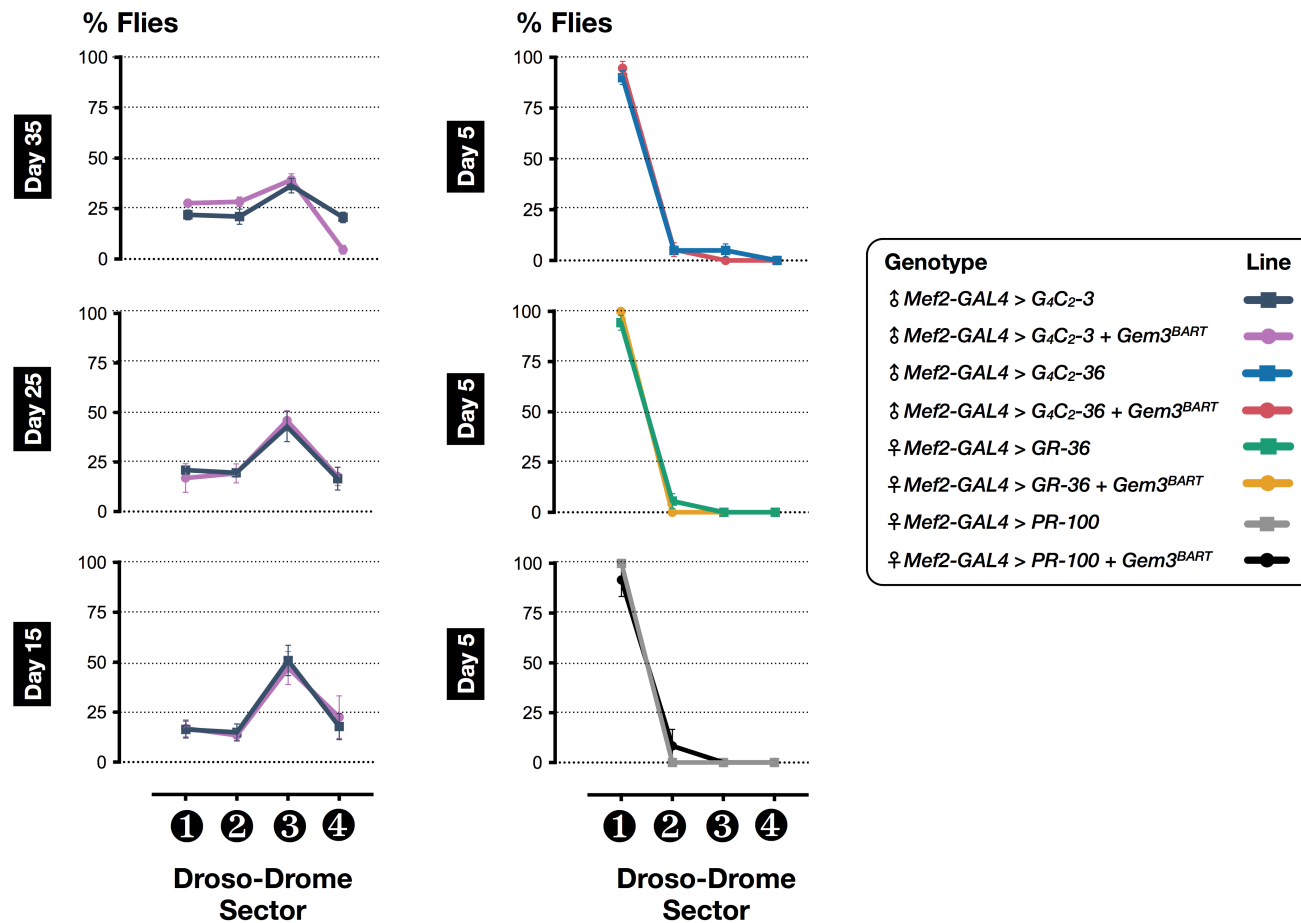

**Figure S2. *C9orf72* expanded hexanucleotide repeats and DPR proteins are not modifying factors in a *Gem3* mutant.** No difference was observed in wildtype vs. *Gem3<sup>BART</sup>* animals expressing normal length ( $G_4C_2-3$ ) or expanded ( $G_4C_2-36$ ) hexanucleotide repeats, the latter reducing motor function in young adults. Expression of glycine-arginine (GR-36) or proline-arginine (PR-100) DPR proteins was also found to induce motor defects at an early stage but, again, no disparities were apparent between the wild-type and *Gem3* mutant flies. Data presented are the mean  $\pm$  S.E.M. of at least 4 independent experiments, and, for each time point measured,  $n \geq 60$  per genotype. Symbols indicate the sex of the genotype assessed: ♂ = males, and ♀ = females.

SUPPLEMENTARY FIGURE S3

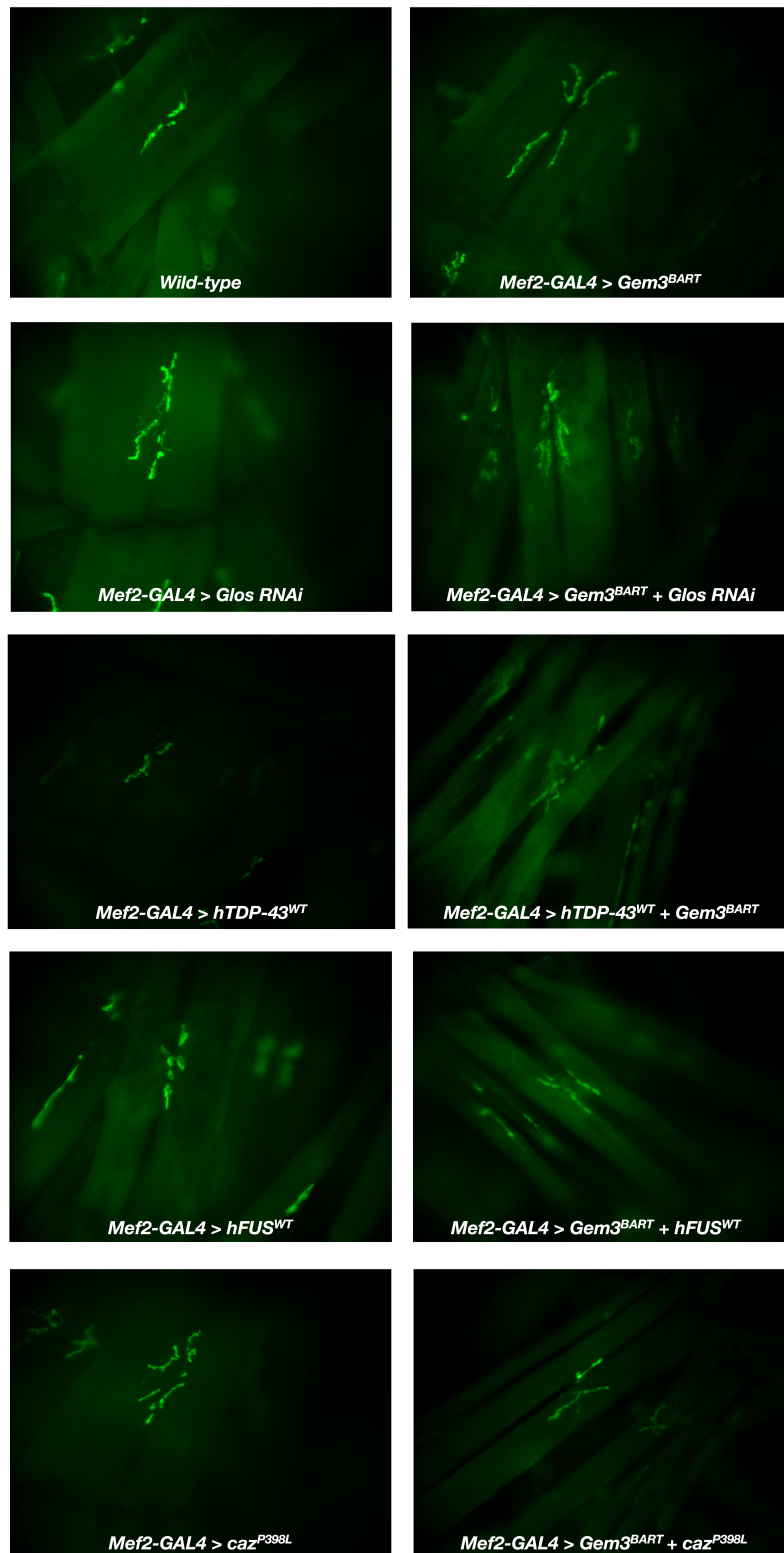

**Figure S3.** Uncropped and unedited (no adjustments in fluorescent signal intensity) images of neuromuscular junctions displayed in Fig. 7A.

# SUPPLEMENTARY FIGURE S4

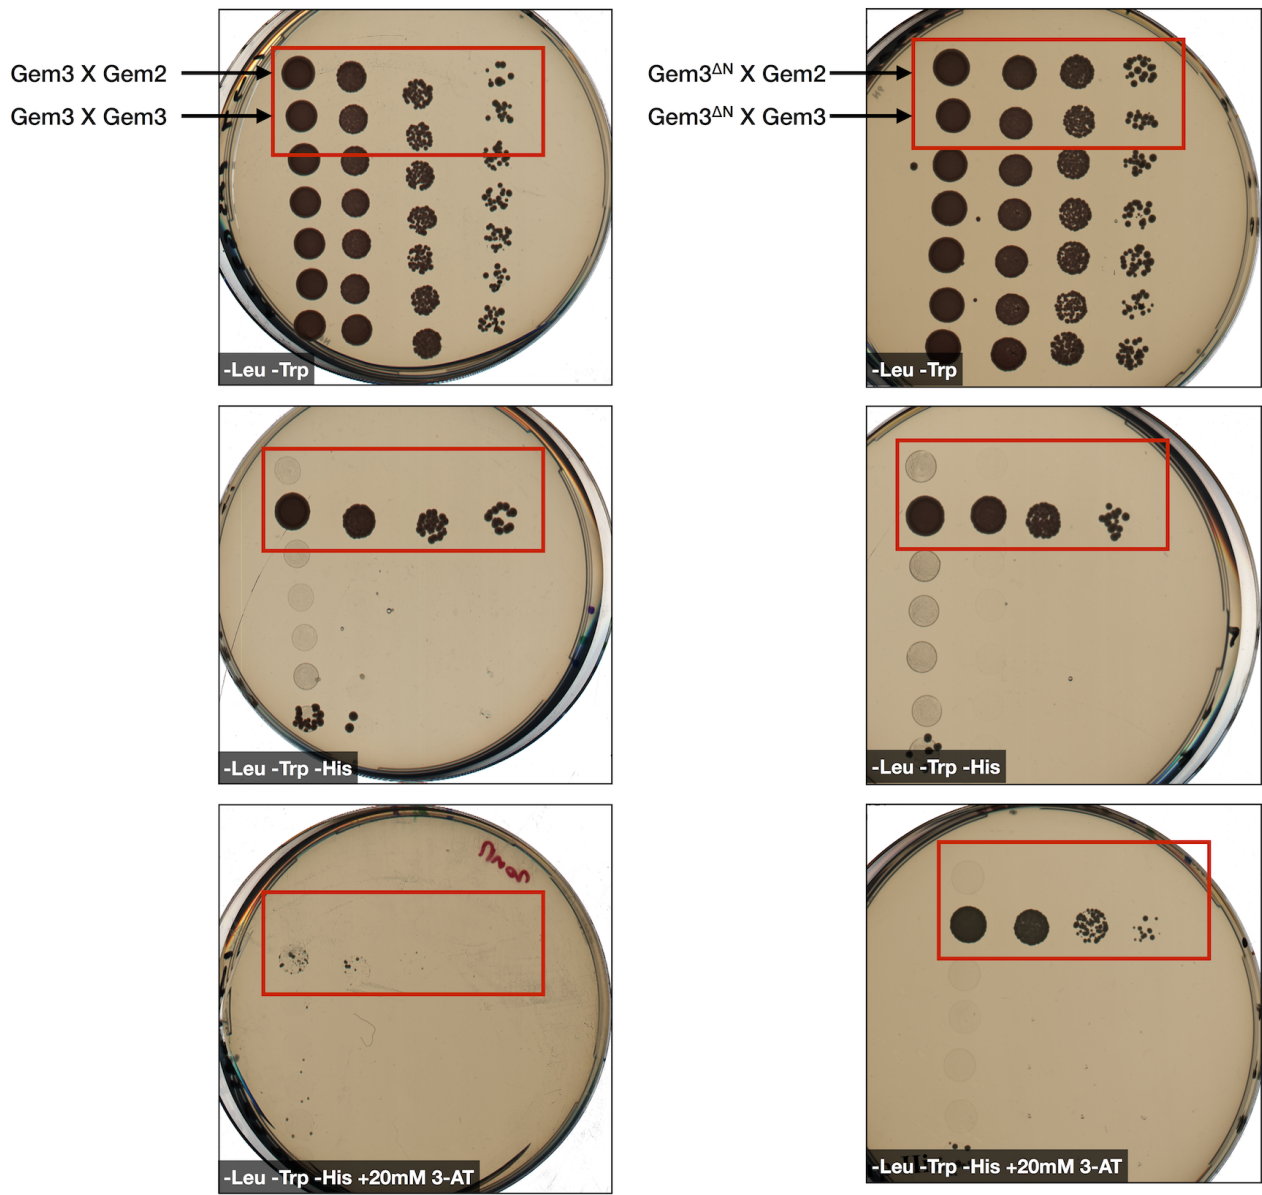

**Figure S4.** Uncropped and unedited images of yeast two-hybrid assays displayed in Fig. 8B.

## REFERENCES

- 1 Ni, J. Q. *et al.* A genome-scale shRNA resource for transgenic RNAi in *Drosophila*. *Nat Methods* **8**, 405-407, doi:10.1038/nmeth.1592 (2011).
- 2 Dietzl, G. *et al.* A genome-wide transgenic RNAi library for conditional gene inactivation in *Drosophila*. *Nature* **448**, 151-156 (2007).
